# Supplementary material for: Sequential adjustment of cytotoxic T lymphocyte densities improves efficacy in controlling tumor growth
Source: PubMed Central journal article supplement (PMC6707257; doi:10.1038/s41598-019-48711-2), 2019-08-23
Supplement: 41598_2019_48711_MOESM1_ESM.pdf [file 41598_2019_48711_MOESM1_ESM.pdf]

# **Sequential adjustment of cytotoxic T lymphocyte densities improves efficacy in controlling tumor growth**

Roxana Khazen<sup>1,2</sup>, Sabina Müller<sup>1</sup>, Fanny Lafouresse<sup>1</sup>, Salvatore Valitutti<sup>1,3,6\*</sup> and Sylvain Cussat-Blanc<sup>4,5,6</sup>

<sup>1</sup>INSERM U1037, Centre de Recherche en Cancérologie de Toulouse (CRCT), Université de Toulouse III-Paul Sabatier, 31057 Toulouse, France. Team: Molecular dynamics of lymphocyte interaction, « Equipe labellisée Ligue Nationale contre le Cancer 2018 »

<sup>2</sup>Present Address : INSERM U1223, Dynamics of Immune Responses Unit, Institut Pasteur, 75015 Paris, France.

<sup>3</sup>Department of Pathology, Institut Universitaire du Cancer-Oncopole de Toulouse, 31059 Toulouse, France.

<sup>4</sup>Institute of Advanced Technologies in Living Sciences, CNRS – UMS3505, Toulouse, France. Team: Onko3D

<sup>5</sup>University of Toulouse, Institute of Research in Informatics of Toulouse, CNRS – UMR5505, Toulouse, France. Team: REVA

<sup>6</sup>These authors are co-senior authors

\*Corresponding author: [salvatore.valitutti@inserm.fr](mailto:salvatore.valitutti@inserm.fr)

Supplementary Figure 1

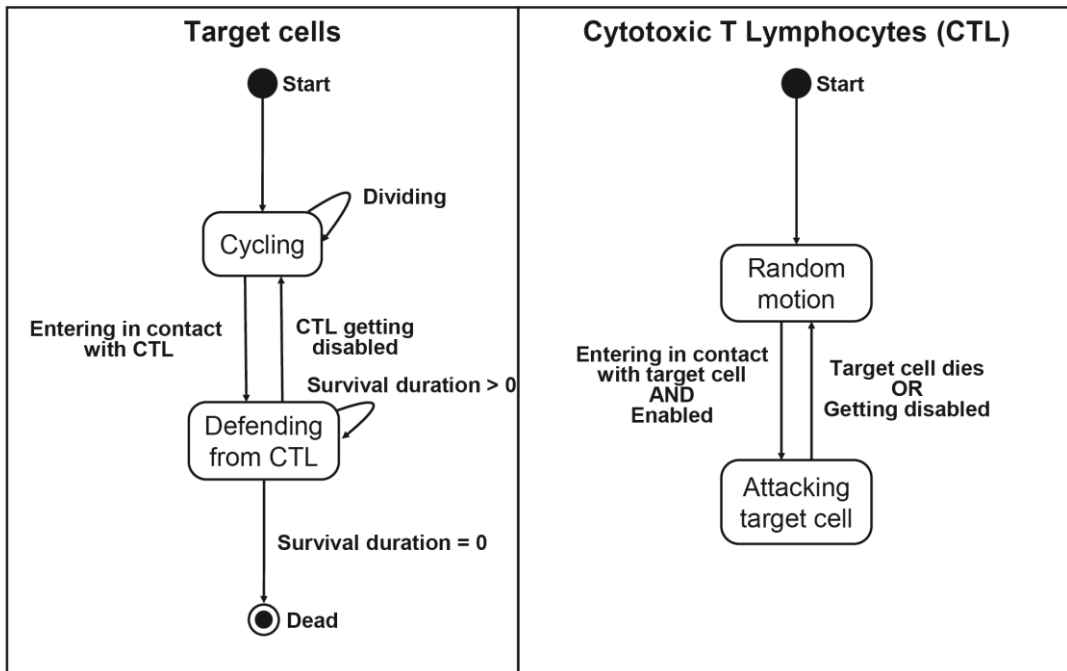

*Supplementary Figure 1:* State-transition diagram of target cells and CTL behaviors. It describes the life cycle of virtual cells during simulations.

Supplementary Figure 2

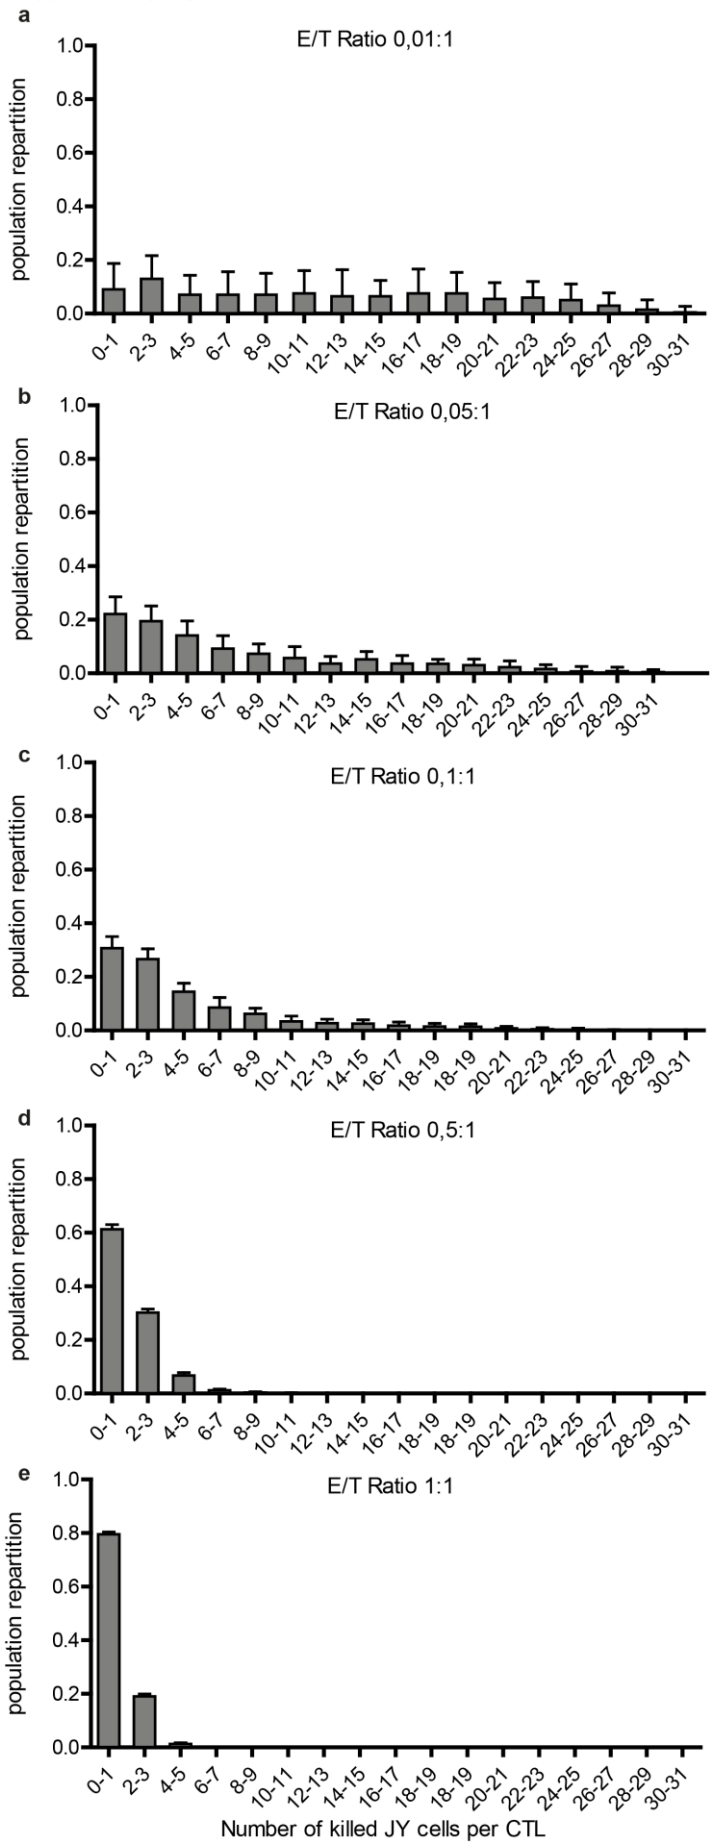

*Supplementary Figure 2. Computational modeling highlights deficiency of individual CTL killing capacity at high CTL densities.* The panels show the population repartition of CTL killing efficacy at different E/T ratios. The fraction of CTL within the whole population killing a high number of conventional target cells increases with the decrease of the E/T ratio. The E/T ratios simulated in the model are indicated in panels. Results correspond to mean +/- SD of 20 independent runs.

Supplementary Figure 3

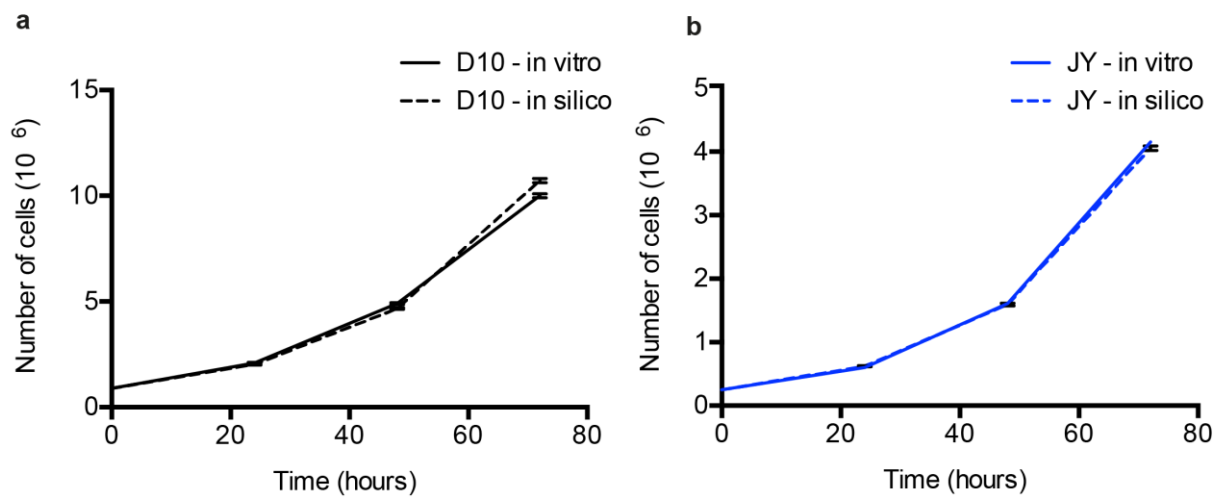

Supplementary Figure 3. Experimental and in silico modeled rate of target cell division. Panel (A), melanoma cells; panel (B) conventional target cells.

Supplementary Table1

Parameters used in the model and their values

|              | Name                                   | Value               | Unit                     | Source                                               |
|--------------|----------------------------------------|---------------------|--------------------------|------------------------------------------------------|
| Global       | Time step                              | 1.2                 | Min                      | Decided                                              |
| Target cells | Cell cycle duration                    | MC: 20<br>CC: 17.75 | Hours                    | Experimentally determined in this study              |
|              | Cell cycle duration standard deviation | MC: 1<br>CC: 1      | Hours                    | Experimentally determined in this study              |
|              | G1S phase duration                     | MC: 14<br>CC: 13.67 | Hours                    | Experimentally determined in this study              |
|              | G2M phase duration                     | MC: 6<br>CC: 4.08   | Hours                    | Experimentally determined in this study              |
|              | Survival duration                      | MC: 55<br>CC: 11    | Min                      | From Christophe et al 2015                           |
|              | Disabling radius                       | 87.5                | $\mu\text{m}$            | Parameter fitting on experimental data in this study |
| CTL          | Motion speed                           | 8.66                | $\mu\text{m}/\text{min}$ | From Christophe et al 2015                           |
|              | Time between direction switch          | 1                   | Hour                     | From Christophe et al 2015                           |
|              | Disabling probability                  | 0.00275             | None                     | Parameter fitting on experimental data in this study |

Supplementary Table2

Paired statistical comparison of CTL efficacy:  
comparison of sequential CTL addition versus  
initial addition for various CTL numbers

| Protocols               | Wilcoxon test time | Wilcoxon p-values |
|-------------------------|--------------------|-------------------|
| 2:1+2:1 vs 4:1          | 168h (7 days)      | 2.53e-4           |
| 4:1+4:1 vs 8:1          | 264h (11 days)     | 2.16e-3           |
| 4:1+4:1+4:1 vs 12:1     | 360h (15 days)     | 8.81e-5           |
| 4:1+4:1+4:1+4:1 vs 16:1 | 360h (15 days)     | 1.18e-4           |

**Supplementary movies legends**

*Movie 1.* Example of a simulated interaction at 1:1 E/T ratio

*Movie 2.* Example of a simulated interaction at 10:1 E/T ratio
